# Supplementary material for: Studies on Annihilation and Coreactant Electrochemiluminescence of Thermally Activated Delayed Fluorescent Molecules in Organic Medium
Source: Molecules. 2022 Nov 2;27(21):7457. doi: 10.3390/molecules27217457 (PMC9658960; doi:10.3390/molecules27217457)
Supplement: Supplementary file 1 [file molecules-27-07457-s001.zip › molecules-2000084-supplementary.pdf]

**Supporting information**

**Studies on Annihilation and Coreactant  
Electrochemiluminescence of Thermally Activated  
Delayed Fluorescent Molecules in Organic  
Medium**

**Ping Huang<sup>†</sup>, Xingzi Zou<sup>†</sup>, Zhiyun Xu, Yanting Lan, Lijuan Chen<sup>\*</sup>, Baohua Zhang<sup>\*</sup>  
and Li Niu**

Center for Advanced Analytical Science, Guangzhou Key Laboratory of Sensing  
Materials & Devices, School of Chemistry and Chemical Engineering,  
Guangzhou University, Guangzhou 510006, China

<sup>\*</sup> Correspondence: gdchenlj@gzhu.edu.cn (L.C.); ccbhzhang@gzhu.edu.cn  
(B.Z.)

<sup>†</sup> These authors contributed equally to this work.

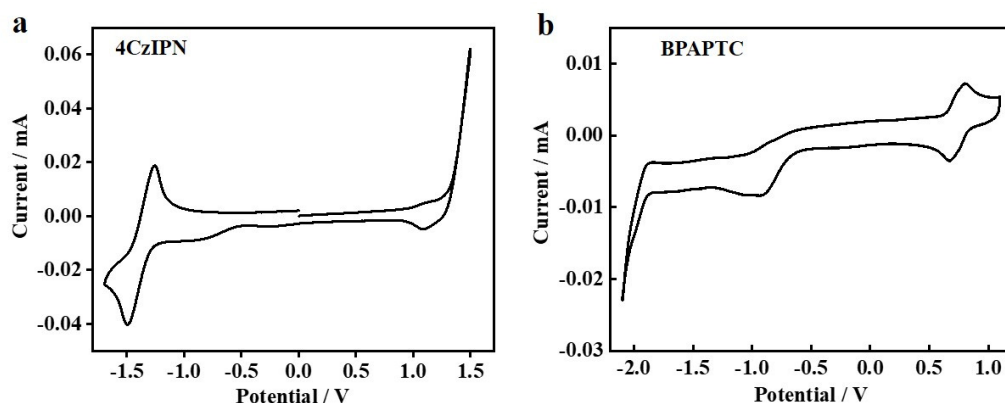

**Figure S1.** The CV curves of 0.1 mM 4CzIPN DCM solution (a) and 0.1 mM BPAPTC DCM solution (b) (vs. Ag/Ag<sup>+</sup>).

Notation: The electroreduction current starting at ca. -0.75 V for BPAPTC should not be ascribed to electroreduction of BPAPTC itself. Most likely, it is due to the electrochemical reduction of trace water or others dissolved in the DCM solvent.

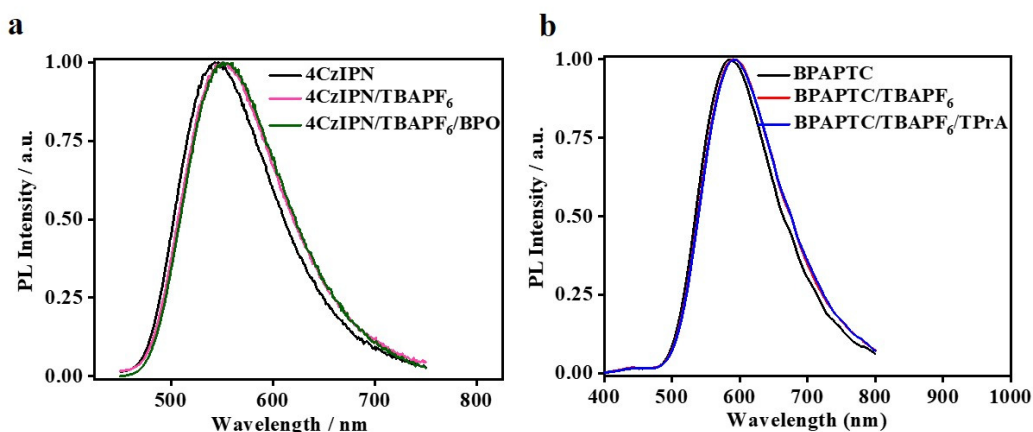

**Figure S2.** (a) Normalized PL spectra of 0.1 mM 4CzIPN in DCM, 0.1 mM 4CzIPN in DCM with 0.1 M TBAPF<sub>6</sub>, 0.1 mM 4CzIPN in DCM with 0.1 M TBAPF<sub>6</sub> and 25 mM BPO. (b) Normalized PL spectra of 0.1 mM BPAPTC in DCM, 0.1 mM BPAPTC in DCM with 0.1 M TBAPF<sub>6</sub>, 0.1 mM BPAPTC in DCM with 0.1 M TBAPF<sub>6</sub> and 25 mM TPrA.
